# Supplementary material
Source: publisher figshare collection journal article supplement (https://frontiersin.figshare.com/ndownloader/files/24646223)
Supplement: Supplementary file [file 24646223]

## Supplementary Figure 1

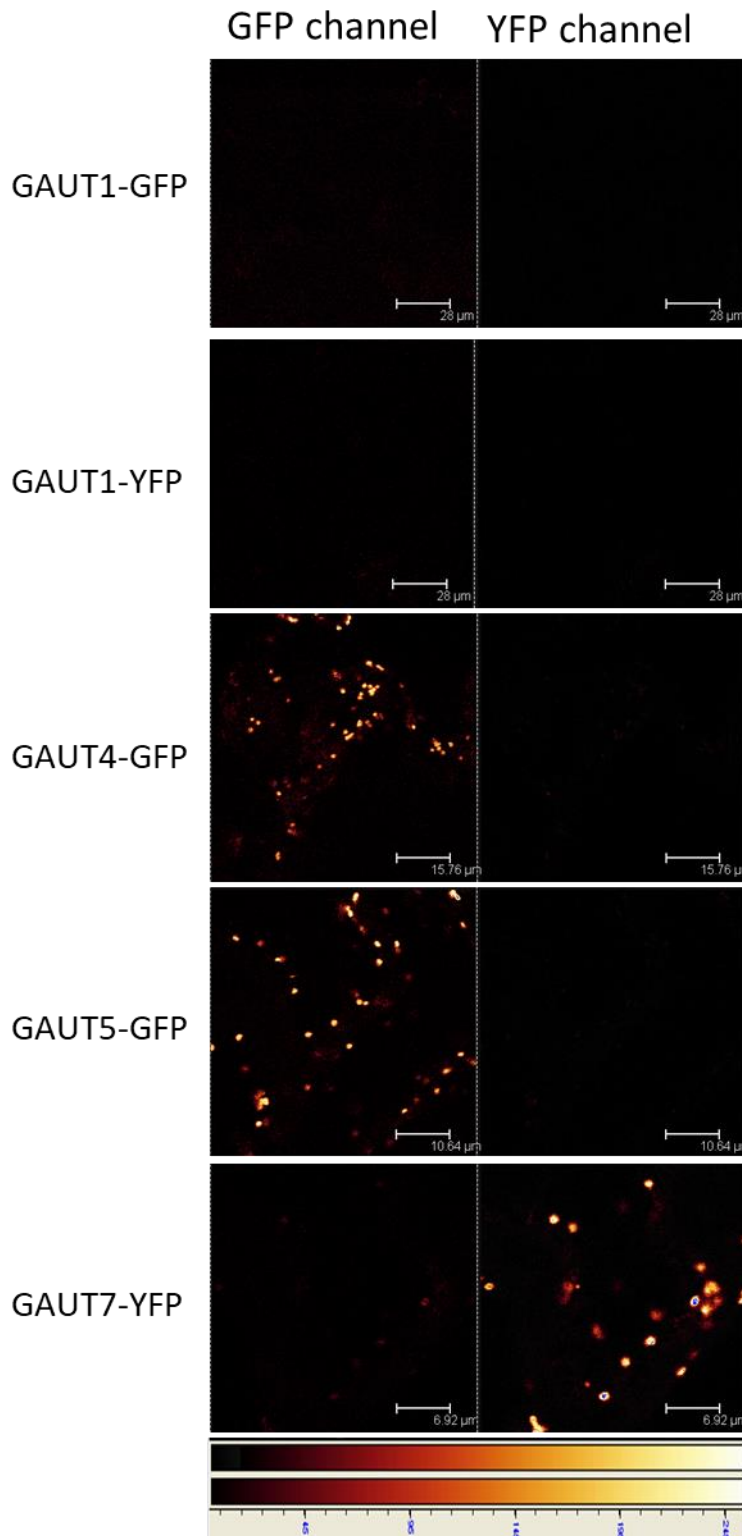

**Supplementary Figure 1.** Localization analysis of GAUT GFP/YFP fusion proteins and test for signal cross-bleeding of GFP and YFP channels. GAUT1-GFP, GAUT1-YFP, GAUT4-GFP, GAUT5-GFP, GAUT7-GFP constructs under the control of 35S promoter were transiently expressed in *N. benthamiana*. CSLM analysis was performed 3 days after transfection. Recorded emission within the GFP and YFP channels is shown.

# Supplementary Figure 2

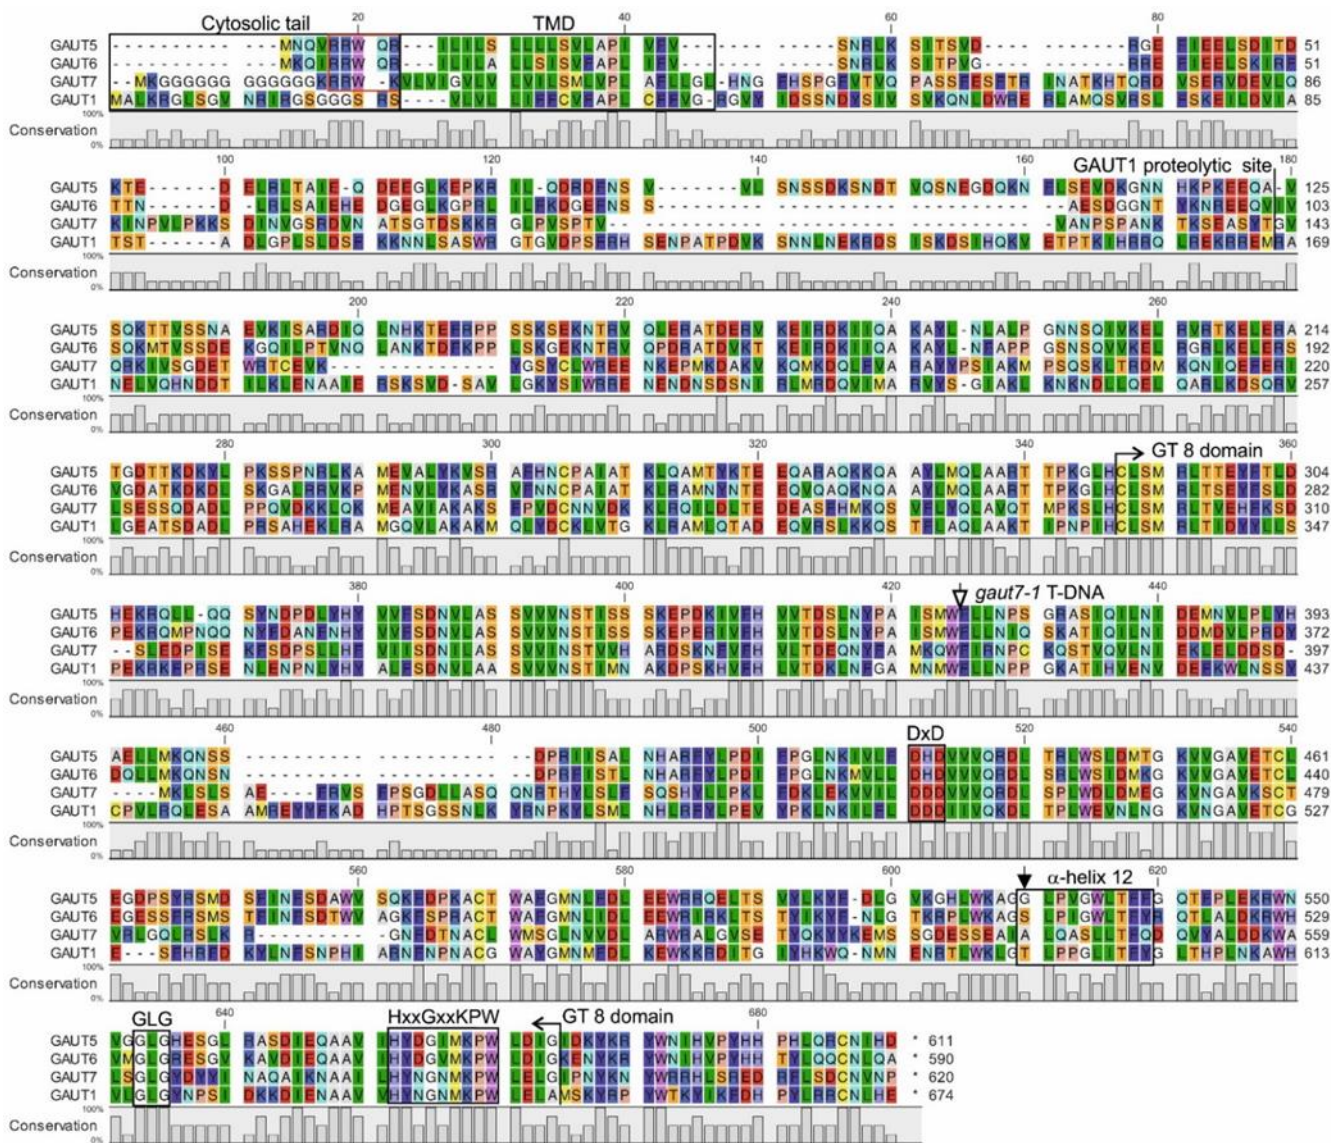

**Supplementary Figure 2.** Amino acid sequence alignment of GAUT1, GAUT5, GAUT6, and GAUT7, related to Figure 3. Conserved regions (GT8 domain, DxD motif, GLG motif, HxxGxxKPW motif, α-helix 12) and structural motifs (predicted cytosolic tails and transmembrane domain, TMD) are indicated by arrows and boxes. The predicted nucleophilic residues are marked by a black arrow. The T-DNA insertion site in the *gaut7-1* mutant is marked by an open arrow.

## Supplementary Figure 3

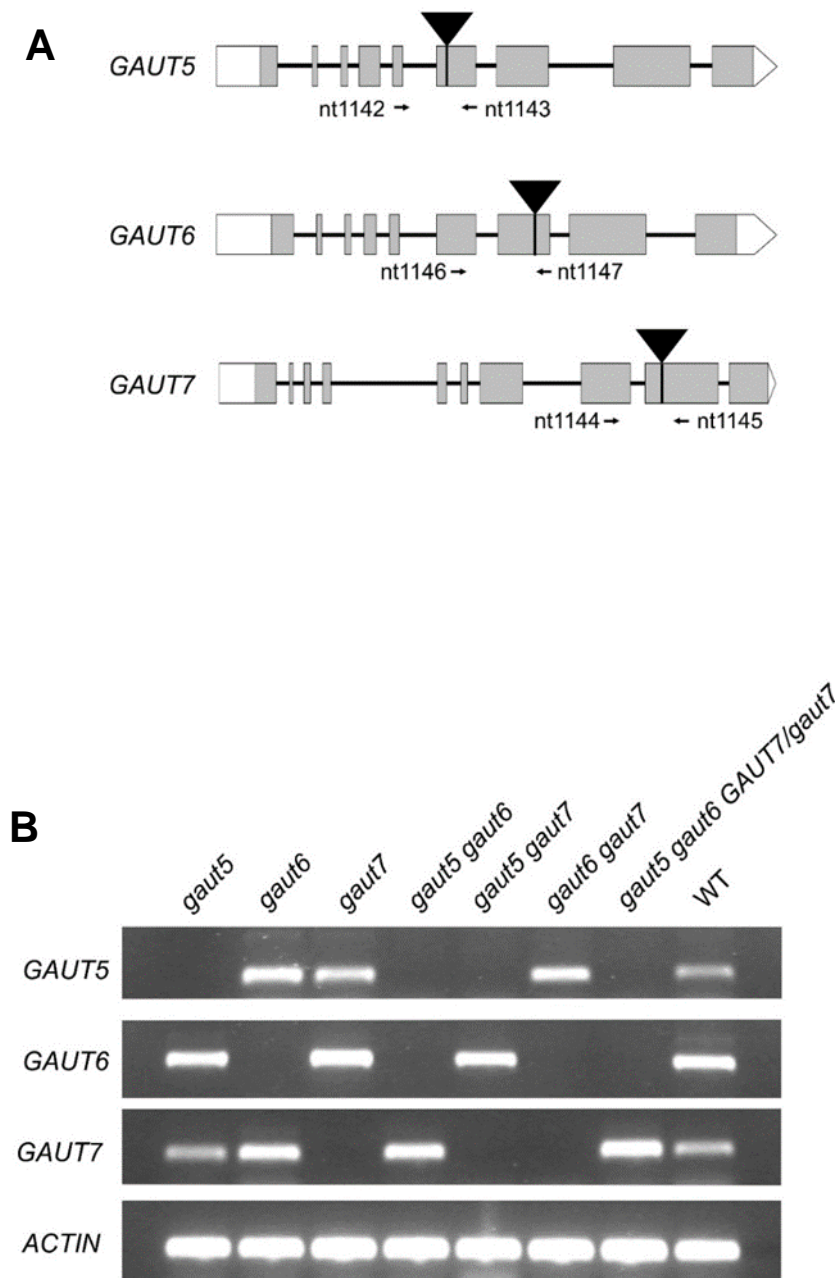

**Supplementary Figure 3.** RT-PCR analysis of the *gaut* mutants, related to Figure 3  
RT-PCR analysis of the *gaut5*, *gaut6*, *gaut7* homozygous single, homozygous double, and *gaut5*<sup>-/-</sup> *gaut6*<sup>-/-</sup> *gaut7*<sup>+/-</sup> triple mutants.

(A) Gene models and primer binding sites. Primer sequences are available in Supplementary Table 2.

(B) RT-PCR products, generated from RNA isolated from rosette leaves, separated by agarose gel electrophoresis. Total RNA was isolated and equal amounts of RNA were used as the template. RT-PCR of the *ACTIN* transcript is shown as a positive control.

# Supplementary Figure 4

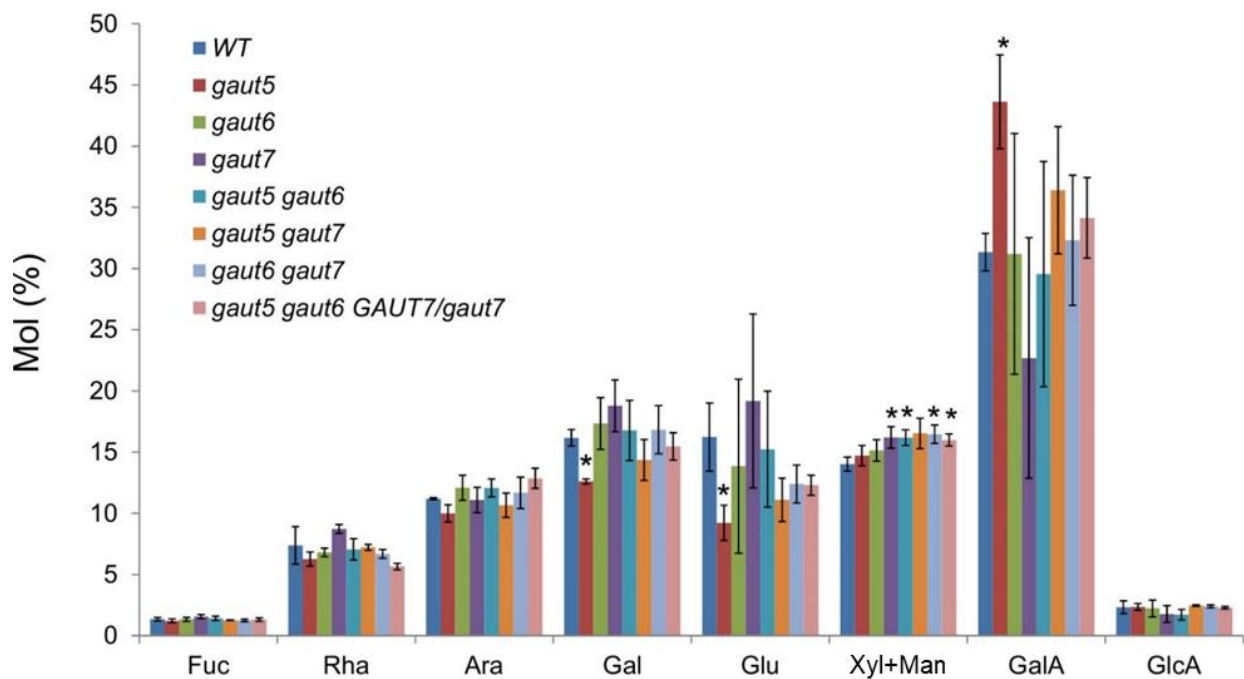

**Supplementary Figure 4.** Monosaccharide composition analysis of *gaut* mutants. Total alcohol insoluble residues (AIR) were extracted from rosette leaves of the *gaut5*, *gaut6*, *gaut7* homozygous single, homozygous double, and triple *gaut5*<sup>-/-</sup> *gaut6*<sup>-/-</sup> *gaut7*<sup>+/-</sup> mutants followed by enzymatic starch removal. The destarched materials were hydrolyzed by trichloroacetic acid and analyzed by HPAEC PAD as described in Stranne et al. (2018). Xyl+Man represents the combined Xyl and Man residues which cannot be distinguished by the method used. Significant differences are shown by \* (Student's t-test,  $p < 0.05$ ,  $n = 4$ , error bars represent SEM).

## Supplementary Figure 5

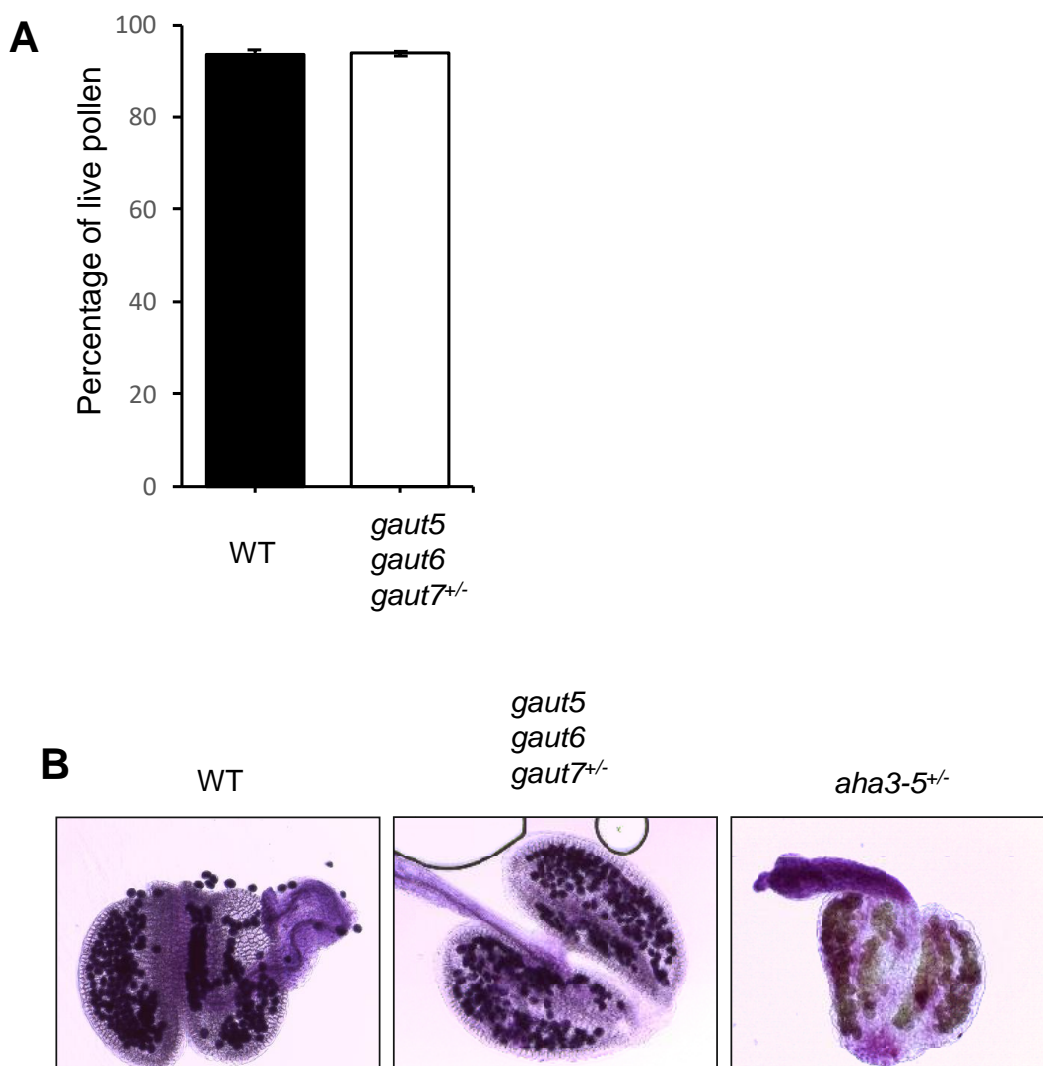

**Supplementary Figure 5.** Viability of pollen from the WT and *gaut5<sup>-/-</sup> gaut6<sup>-/-</sup> gaut7<sup>+/-</sup>* mutant (A) Pollen harvested from flowers was stained with fluorescein diacetate (n>100). There was no statistically significant difference in the percentage of live pollen in the WT compared to the heterozygous triple mutant (One-way ANOVA, p>0.05).

(B) Analysis of anthers using Alexander staining. Both the WT and the heterozygous triple mutant pollen showed purple staining, indicating pollen viability. As a control, staining of anthers from the *aha3-5<sup>+/-</sup>* plants showed green staining in approximately half of the pollen due to pollen lethality as previously reported (Robertson et al., 2014).



## Supplementary Figure 6

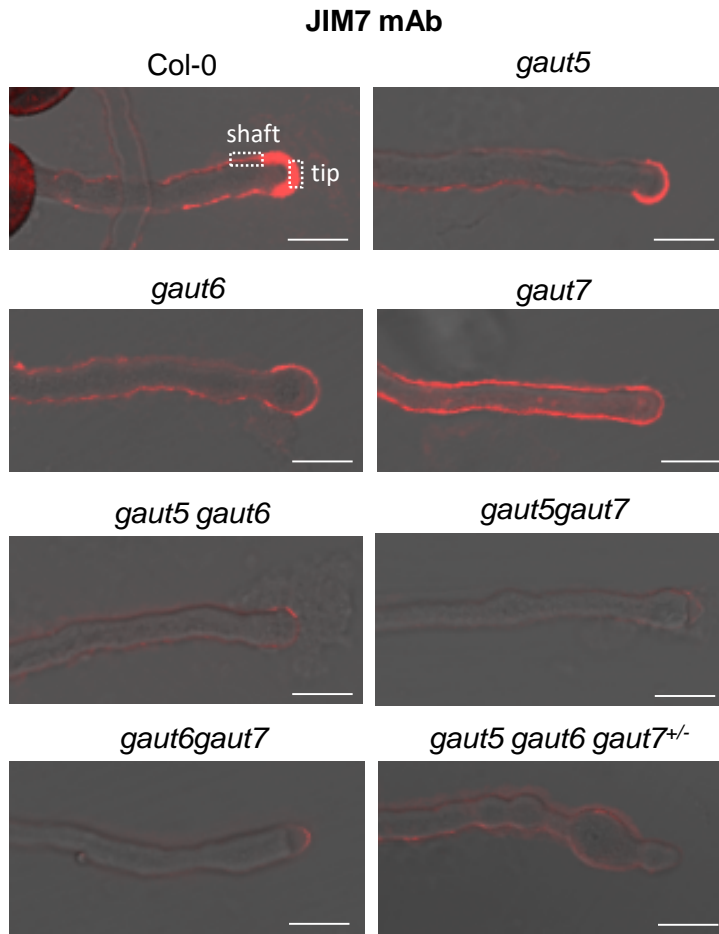

**Supplementary Figure 6.** Immunolocalization analysis of *gaut* pollen tubes. Immunolocalization of highly methyl esterified HG in pollen tubes of *gaut* mutant combinations using JIM7 antibody. The dashed square indicates the regions used for quantification in Fig. 5D. At least 8 pollen tubes were analyzed for each genotype in two independent experiments. Overlay with the DIC channel. Scale bars = 10  $\mu$ m.

## Supplementary Figure 7

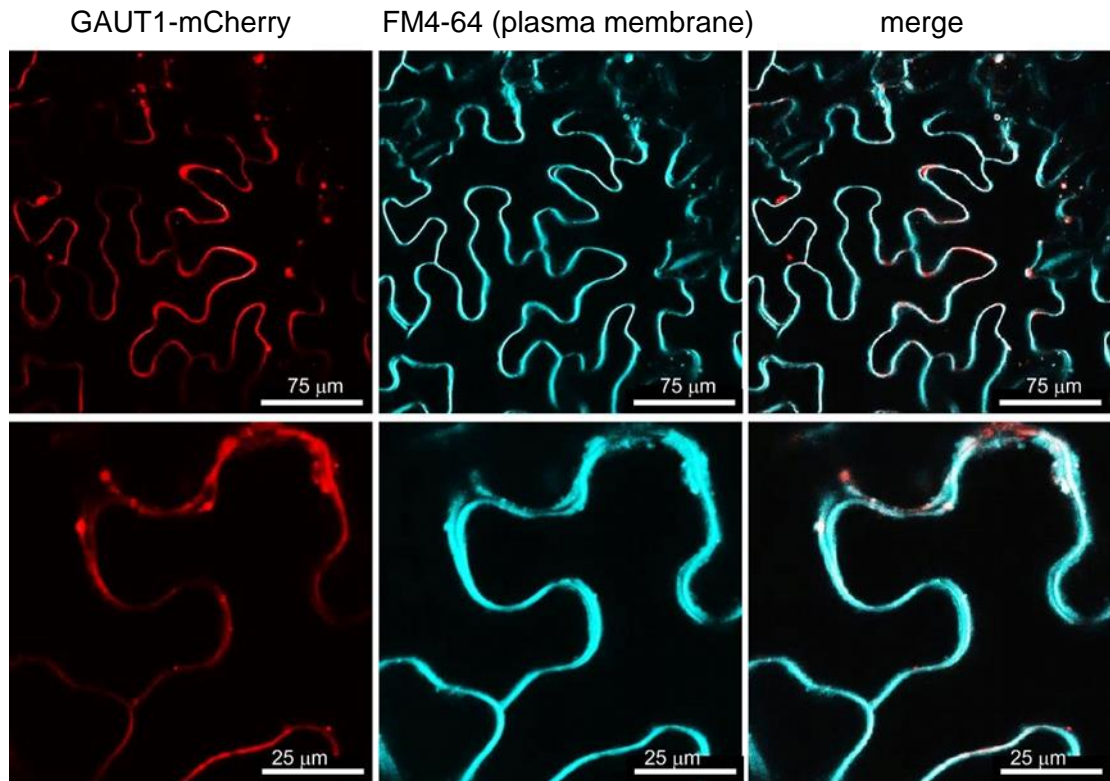

**Supplementary Figure 7.** Subcellular localization of GAUT1-mCherry, GAUT1-mCherry, a fusion protein wherein GAUT1 was C-terminally fused with mCherry, was transiently expressed in *N. benthamiana* for 3 days and the subcellular localization was determined by confocal scanning laser microscopy. Left column, mCherry signals. Middle column, FM4-64 for plasma membrane staining. The right column, merges of the mCherry and FM4-64 signals. The top row, imaging using  $\times 1000$  magnification. The bottom row, zoom-in images.

## Supplementary Figure 8

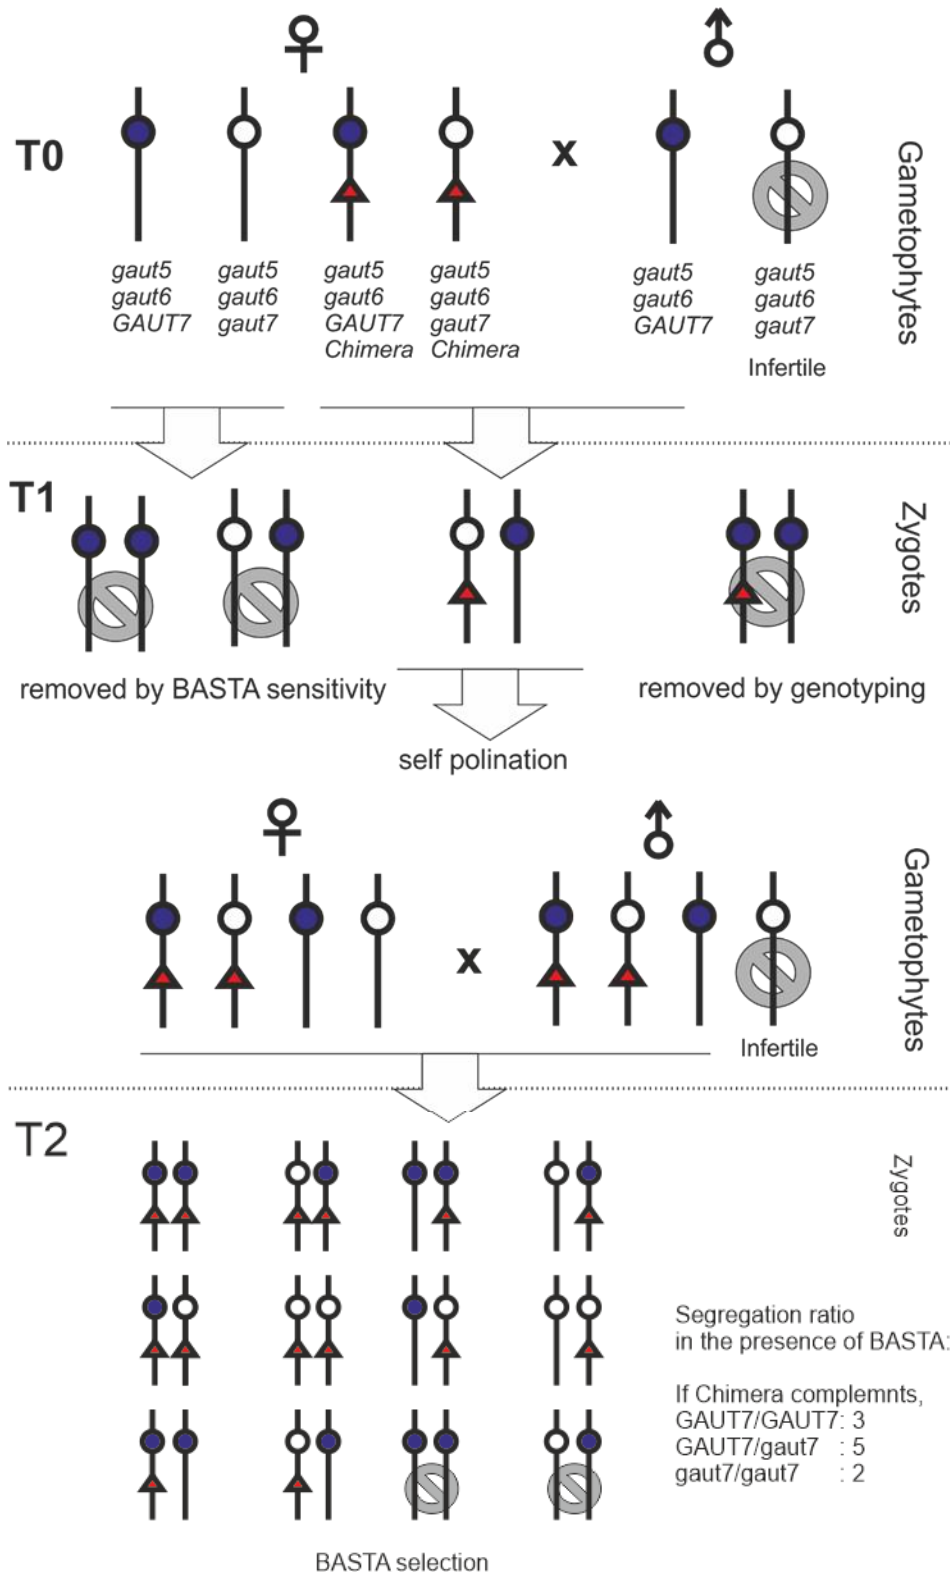

**Supplementary Figure 8.** Segregation scheme of the *pGAUT1::XYLT:GAUT1* chimera. Schematic illustration of the segregation of the *gaut7* locus in gametophytes of the triple mutant (*gaut5<sup>-/-</sup> gaut6<sup>-/-</sup> gaut7<sup>+/-</sup>*) transformed with the chimera. The *gaut7<sup>+</sup>* locus, indicated as *GAUT7*, is shown as a blue-filled circle, the *gaut7<sup>-</sup>* locus as an open circle, and the *GAUT1* chimera as a red-filled triangle.



# Supplementary Table 1

Segregation of herbicide resistance in the T3 population of the 897-10 line, the negative control line, and the WT. \* Significant different based on Chi square test ( $p < 0.001$ )

| Transgenic lines<br>(T2 generation) | <i>n</i> | Herbicide resistance in the T3 population:                                     |           |
|-------------------------------------|----------|--------------------------------------------------------------------------------|-----------|
|                                     |          | Observed values (expected value based on the assumption of a single insertion) |           |
|                                     |          | Resistant                                                                      | Sensitive |
| 897-10                              | 156      | 120 (117)                                                                      | 36 (39)   |
| Negative control                    | 125      | 96 (94)                                                                        | 29 (22)   |
| WT*                                 | 42       | 0                                                                              | 42        |

# Supplementary Table 2

## Primer sequences

| Primer                                                                   | Sequence (5'-3')                                                   |
|--------------------------------------------------------------------------|--------------------------------------------------------------------|
| <b>Production of entry vectors by BP recombination</b>                   |                                                                    |
| attR1-GAUT4 fwd                                                          | TCGAAGGAGATAGAACCatgatggtgaagcttcgcaa                              |
| attR2-GAUT4 rvs                                                          | GTACAAGAAAAGCTGGGTCaggattgattgcttctc                               |
| attR1-GAUT9 fwd                                                          | TCGAAGGAGATAGAACCatggcgggtggccttcggtg                              |
| attR2-GAUT9 rvs                                                          | GTACAAGAAAAGCTGGGTCgagacccaaattgcacatct                            |
| <b>Generating promoter GUS fusions</b>                                   |                                                                    |
| GAUT5 fwd                                                                | <u>AAG CTT</u> GAG AAG CGA GCG ATA CCG TAA AGA G                   |
| GAUT5 rev                                                                | <u>TCT AGA</u> CAA TGT GCG TAA CTT CTC AGA GAA CGC                 |
| GAUT6 fwd                                                                | <u>TCT AGA</u> CTT TCT CTT TAT CTG TTG GGC TTA ATC ACT CAC         |
| GAUT6 rev                                                                | <u>GGA TCC</u> GAA TCT ACA AAT AAA AAA AAA TCC CCA AAT CTA TCT TCC |
| <b>Generating GFP and YFP controls for pixel mean intensity analysis</b> |                                                                    |
| GAUT6 CTS fwd                                                            | GGCTTAAUATGCGTCGATGGCAGAGGATTTT                                    |
| GAUT6 CTS rvs                                                            | GGTTTAAUccATTTCGATACGAAAATAAGCG                                    |
| GAUT7 CTS fwd                                                            | GGCTTAAUATGAAAGTTCTGGTGATTGGAGT                                    |
| GAUT7 CTS rev                                                            | GGTTTAAUccAAGACCGAGTAAGAAAGCAA                                     |
| <b>Genotyping primers</b>                                                |                                                                    |
| LBb1.3                                                                   | ATTTTGCCGATTTTCGGAAC                                               |
| GAUT5 LP                                                                 | CCTTCAATCTGTTAGGAGAGC                                              |
| GAUT5 RP WT                                                              | AATCACAAACCAAGGAGGAAC                                              |
| GAUT5 RP                                                                 | TTGTTTTGTTGTCTATTATCGGGG                                           |
| GAUT6 LP                                                                 | ACCAACAGTCAACCAACTTGC                                              |
| GAUT6 RP                                                                 | TTCAAACCCGGGAATATATCC                                              |
| GAUT7 LP                                                                 | GAGTGTGTTCTCTACCAGC                                                |
| GAUT7 RP WT                                                              | CTCGCTGGACTACAACGTCA                                               |
| GAUT7 RP                                                                 | GGAACCTCCGACAGACAAAGAC                                             |
| <b>Primers for RT-PCR</b>                                                |                                                                    |
| <i>gaut5 fwd</i>                                                         | ACCACAGTAAGCTCGAATGC                                               |
| <i>gaut5 rvs</i>                                                         | CCAGCTCTTTCGTTTCAACT                                               |
| <i>gaut6 fwd</i>                                                         | TGCAACAAAGGACAAGACT                                                |
| <i>gaut6 rvs</i>                                                         | AGCCAAAACATTGTCAGAGAAGA                                            |
| <i>gaut7 fwd</i>                                                         | GCATCGTCCGTTGTGATCAA                                               |
| <i>gaut7 rvs</i>                                                         | GGAACCTCCGACAGACAAAGAC                                             |
| Actin fwd                                                                | ACATTGTGCTCAGTGGTGA                                                |
| Actin rvs                                                                | TCATACTCGGCCTTGAGAT                                                |
| <b>Cloning into DUALmembrane vectors via the SfiI restriction site</b>   |                                                                    |
| GAUT1 fwd SfiI                                                           | <u>GGCCATTACGGCCATGGCGCTAAAGCGAGGGC</u>                            |
| GAUT1 rvs SfiI                                                           | <u>GGCCGAGCGGCCTTATTTCATGAAGGTTGCAACG</u>                          |
| GAUT5 fwd SfiI                                                           | <u>GGCCATTACGGCCATGAATCAAGTTCGTGC</u>                              |
| GAUT5 rvs SfiI                                                           | <u>GGCCGAGCGGCCTCAATCGTGAATGTTGC</u>                               |
| GAUT6 fwd SfiI                                                           | <u>GGCCATTACGGCCATGAAACAAATTCGTCTGATGG</u>                         |
| GAUT6 rvs SfiI                                                           | <u>GGCCGAGCGGCCTCAAGCTTGAAGATTGCACTG</u>                           |
| GAUT7 fwd SfiI                                                           | <u>GGCCATTACGGCCATGAAAGCGGAGGCGGTGG</u>                            |
| GAUT7 rvs SfiI                                                           | <u>GGCCGAGCGGCCTCAAGGATTCACGTTACAG</u>                             |
| Anp1 fwd SfiI                                                            | ATTAACAAGGCCATTACGGCCATGAAGTATAATAACAGAAAACCTC                     |
| Anp1 rvs SfiI                                                            | AACTGATTGGCCGAGGCGGCCTAGTTTCTATCAGGGTCGAAGTC                       |
| <b>Generating GAUT1 chimeric proteins</b>                                |                                                                    |
| GAUT1 CTS fwd                                                            | GGCTTAAUATGGCGCTAAAGCGAGGGC                                        |
| GAUT1 CTS rvs                                                            | GTCGCTTUTCTGCACCTCCCTTAAAGAAATCAAG                                 |
| GAUT1 C-region fwd                                                       | AAGCGACUGGAGGTGCAGGACGGGCAAATGAGTTAG                               |
| GAUT1 C-region rvs                                                       | GGTTTAAUCCTTCATGAAGGTTGCAACG                                       |
| GMII CTS fwd                                                             | GGCTTAAUATGCCGTTCTCTCGTATATCG                                      |
| GMII CTS rvs                                                             | GTCGCTTUCCGATTGGATCTGGAGGTAAG                                      |
| XYLT CTS fwd                                                             | GGCTTAAUATGAGTAAACGGAATCCG                                         |
| XYLT CTS rvs                                                             | GTCGCTTUCTTTGTAAATCCATCCCGA                                        |
| GAUT1 chimera C-region fwd                                               | AAGCGACUCGGGCAAATGAGTTAGTTC                                        |
| GAUT1 rvs                                                                | GGTTTAAUATTATTCATGAAGGTTGCAACG                                     |
| proGAUT1 fwd                                                             | GGCTTAAUCTTACTGTTGTTTGACCC                                         |
| proGAUT1 USER rvs                                                        | GGTTTAAUGCTGAGGTTTAATTAAGCCTCAGCCCTTGACAGCTCGTCCAT                 |
